# Supplementary material for: Comparison of poly(styrene-divinylbenzene)-based monolithic and bead-based methodologies used in NANOFLOW LCMS for proteomic studies
Source: Royal Society of Chemistry journal article supplement (doi:10.1039/c8ay01264d), 2018-01-01
Supplement: c8ay01264d1.pdf [file c8ay01264d1.pdf]

## Supplementary Material

### **Comparison of Poly(Styrene-Divinylbenzene)-based Monolithic and Bead-based Methodologies Used in NANOFLOW LCMS for Proteomic Studies**

Pei-Lun Tsai,<sup>1,2</sup> Tsu-E Sung,<sup>1</sup> Chinh-Yen Chong,<sup>1</sup> Sheng-Yu Huang,<sup>2</sup> Sung-Fang Chen<sup>1\*</sup>

<sup>1</sup> National Taiwan Normal University, Department of Chemistry, Taipei, Taiwan

<sup>2</sup> Mithra Biotechnology Inc., New Taipei City, Taiwan

\*Corresponding author. E-mail: [sfchen@ntnu.edu.tw](mailto:sfchen@ntnu.edu.tw)

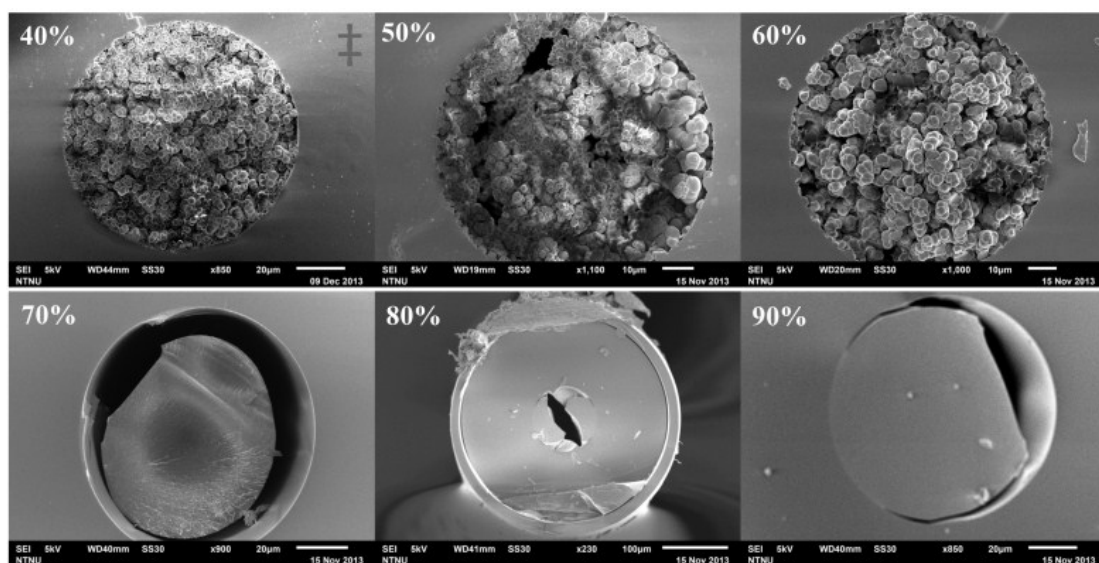

**Fig. S1** Scanning electron microphotographs of different concentrations for SDVB monolithic capillary column

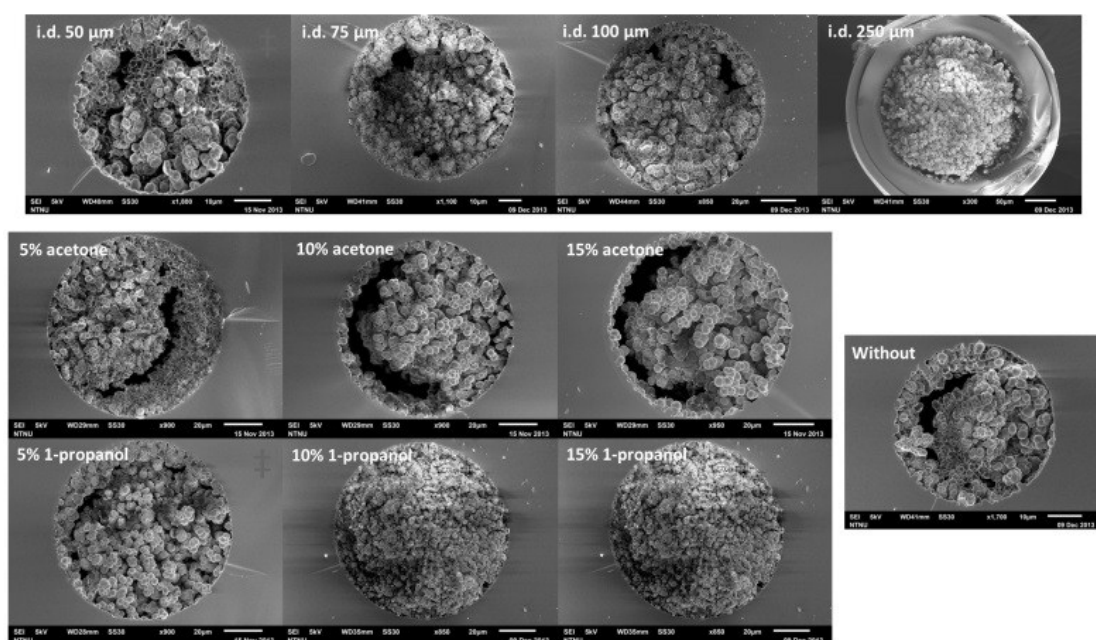

**Fig. S2** Scanning electron microphotographs of varying inner diameter and percentage of porogenic reagents for SDVB monolithic capillary column

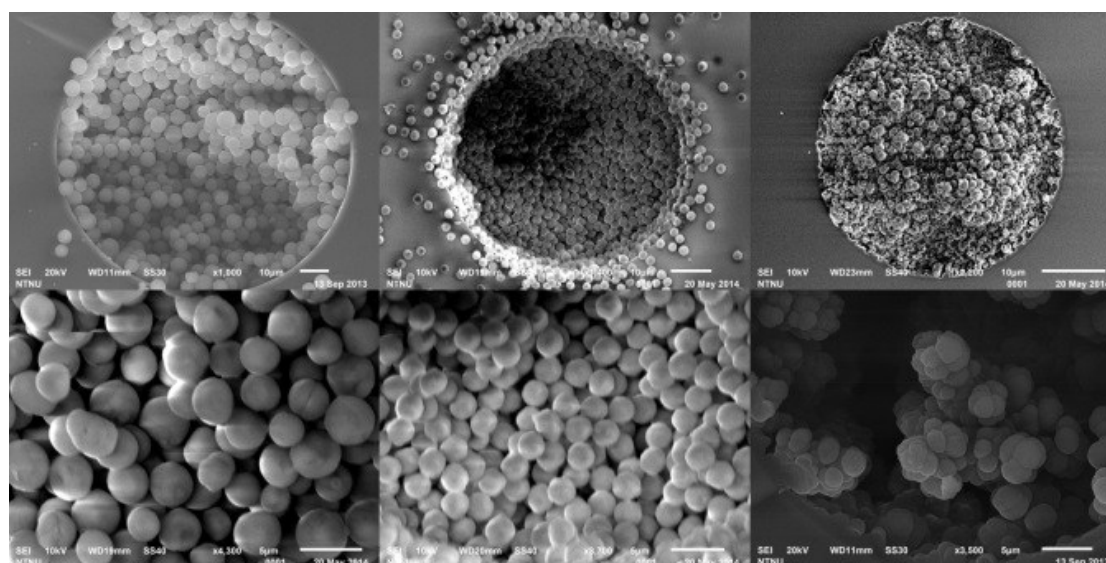

**totally porous silica C18**  
**3 μm, 100Å**

**HALO® fused-core C18**  
**2.7 μm, 90Å**

**SDVB monolithic**  
**optimized**

**Fig. S3.** Scanning electron microphotographs of totally porous silica C18, HALO fused-core C18, and SDVB monolithic capillary column, respectively

| Tryptic BSA           | Amount | # of Queries | # of Matches | # of Sequence | Sequence coverage   | Pressure @ 300 nL min <sup>-1</sup> | column remark    |
|-----------------------|--------|--------------|--------------|---------------|---------------------|-------------------------------------|------------------|
|                       |        |              |              |               |                     |                                     |                  |
| C18/C18               | 0.4 μg | 861          | 83 (79)      | 38 (37)       | 62%                 | 121.5 bar                           | (2/10 cm)        |
| C18/HALO              | 0.4 μg | 408          | 57 (57)      | 24 (24)       | 40%                 | 175.5 bar                           | (i.d. 100/75 μm) |
| C18/4 m               | 0.4 μg | 1173         | 91 (89)      | 30 (29)       | 51%                 | 120.9 bar                           | (2 cm/ 4 m)      |
| SDVB                  |        |              |              |               |                     |                                     | (i.d. 100/50 μm) |
| <b>Tryptic serum</b>  |        |              |              |               | <b># of Protein</b> |                                     |                  |
| C18/C18               | 0.4 μg | 1618         | 251 (186)    | 147 (121)     | 29                  | 121.5 bar                           | (2/10 cm)        |
| C18/HALO              | 0.4 μg | 1480         | 203 (155)    | 86 (75)       | 30                  | 175.5 bar                           | (i.d. 100/75 μm) |
| C18/4 m               | 0.4 μg | 2276         | 155 (116)    | 62 (49)       | 13                  | 120.9 bar                           | (2 cm/4 m)       |
| SDVB                  |        |              |              |               |                     |                                     | (i.d. 100/50 μm) |
| <b>Tryptic fetuin</b> |        |              |              |               |                     |                                     |                  |
| C18/C18               | 0.4 μg | 1566         | 415 (70)     | 85 (12)       | 85%                 | 121.5 bar                           | (2/10 cm)        |
| C18/HALO              | 0.4 μg | 696          | 255 (34)     | 56 (8)        | 59%                 | 175.5 bar                           | (i.d. 100/75 μm) |
| C18/4 m               | 0.4 μg | 900          | 300 (52)     | 53 (9)        | 76%                 | 120.9 bar                           | (2 cm/4 m)       |
| SDVB                  |        |              |              |               |                     |                                     | (i.d. 100/50 μm) |

**Table. S1** The total numbers of MS/MS spectra; MS/MS spectra that matched

peptides, unique peptides, sequence coverage, and column back pressure for different types of columns were evaluated by the separation of tryptic BSA, tryptic serum, and tryptic fetuin with the nanoLC ESI-MS system
